# Supplementary material
Source: Springer Nature journal article supplement (https://www.springermedizin.de/resource/supplementary/12883_2014_1012_MOESM1_ESM.pdf/9456658)
Supplement: MOESM1 [file 9456658]

# Activity & Participation

Social participation  
Management of activity

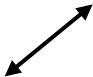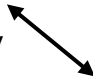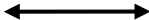

# Body Function

Expressive capacity  
Motor & non-motor symptoms

# Environment

Social network  
Social environment
